# Supplementary material for: Faster Use and Fewer Failures with Needle-Free Nasal Glucagon Versus Injectable Glucagon in Severe Hypoglycemia Rescue: A Simulation Study
Source: PubMed Central journal article supplement — Diabetes Technol Ther. 2017 Jul 1;19(7):423–32. doi: 10.1089/dia.2016.0460 (PMC5563859; doi:10.1089/dia.2016.0460), 2017-07-01
Supplement: Supp_Table1.pdf [file Supp_Table1.pdf]

## Supplementary Data

SUPPLEMENTARY TABLE S1. TRANSMISSION OF INSTRUCTIONS FOR USE BY PEOPLE WITH DIABETES TO CAREGIVERS, AND PROPER APPLICATION OF INSTRUCTIONS FOR USE WITH NASAL GLUCAGON AND INJECTABLE GLUCAGON BY CAREGIVERS AND ACQUAINTANCES

|                                                            | Group 1                                                                 |                                                                  | Group 2                                                                           |                              | <i>Root causes of errors in use</i>                                                                                                                                                                                    |
|------------------------------------------------------------|-------------------------------------------------------------------------|------------------------------------------------------------------|-----------------------------------------------------------------------------------|------------------------------|------------------------------------------------------------------------------------------------------------------------------------------------------------------------------------------------------------------------|
|                                                            | <i>People with diabetes (N=16) who taught the step to caregiver (%)</i> | <i>Caregivers (N=16) who completed the step successfully (%)</i> | <i>Noninstructed acquaintances (N=15) who completed the step successfully (%)</i> | <i>step successfully (%)</i> |                                                                                                                                                                                                                        |
| NG                                                         |                                                                         |                                                                  |                                                                                   |                              |                                                                                                                                                                                                                        |
| Remove spray device from yellow tube                       | 100                                                                     | 100                                                              | 100                                                                               | 100                          |                                                                                                                                                                                                                        |
| Hold device between fingers and thumb                      | 100                                                                     | 100                                                              | 100                                                                               | 100                          |                                                                                                                                                                                                                        |
| Do not test before use                                     | 31                                                                      | 100                                                              | 100                                                                               | 100                          |                                                                                                                                                                                                                        |
| Insert tip gently in one of the patient's nostrils         | 100                                                                     | 100                                                              | 100                                                                               | 100                          |                                                                                                                                                                                                                        |
| Until your fingers touch the outside of the nose           | 75                                                                      | 100                                                              | 100                                                                               | 100                          |                                                                                                                                                                                                                        |
| Push plunger firmly with the thumb                         | 94                                                                      | 100                                                              | 100                                                                               | 100                          |                                                                                                                                                                                                                        |
| Until the red-colored band on plunger is no longer visible | 75                                                                      | 94                                                               | 93                                                                                | 93                           | • Did not know to push plunger until colored band disappeared                                                                                                                                                          |
| Pull device out from nose after administration             | 50                                                                      | 100                                                              | 100                                                                               | 100                          |                                                                                                                                                                                                                        |
| IG                                                         |                                                                         |                                                                  |                                                                                   |                              |                                                                                                                                                                                                                        |
| Remove flip-off seal from bottle                           | 81                                                                      | 56                                                               | 60                                                                                | 60                           | • Did not use bottle because did not reconstitute                                                                                                                                                                      |
| Wipe rubber stopper on bottle with alcohol swab            | 88                                                                      | 19                                                               | 7                                                                                 | 7                            | • Did not notice vial and assumed syringe was pre-filled with the glucagon<br>• Did not see instructions to clean<br>• Cleaning did not cross their mind<br>• Concerned about cleaning, but did not want to waste time |
| Remove needle protector from syringe                       | 81                                                                      | 88                                                               | 93                                                                                | 93                           | • Unable to locate alcohol swabs<br>• Used insulin syringe instead of injectable glucagon syringe                                                                                                                      |
| Inject entire contents of syringe into bottle of glucagon  | 100                                                                     | 56                                                               | 20                                                                                | 20                           | • Did not attempt to use kit; would wait for paramedics<br>• Said the vial was a second dose<br>• Did not remember the vial from when instructed<br>• Did not use the vial due to difficulty removing vial cap         |
| Remove syringe from bottle                                 | 69                                                                      | 44                                                               | 20                                                                                | 20                           | • Did not reconstitute or use vial                                                                                                                                                                                     |
| Swirl bottle gently until glucagon dissolves completely    | 100                                                                     | 44                                                               | 13                                                                                | 13                           | • Did not reconstitute or use vial                                                                                                                                                                                     |
| (Clear and water-like consistency)                         | 56                                                                      | 50                                                               | 13                                                                                | 13                           | • Did not swirl, but twisted vial instead<br>• Did not reconstitute or use vial                                                                                                                                        |

(continued)

SUPPLEMENTARY TABLE S1. (CONTINUED)

|                                                                                 | Group 1                                                            |                                                             | Group 2                                                                      |  | Root causes of errors in use                                                                                                                                                                                                                                                                |
|---------------------------------------------------------------------------------|--------------------------------------------------------------------|-------------------------------------------------------------|------------------------------------------------------------------------------|--|---------------------------------------------------------------------------------------------------------------------------------------------------------------------------------------------------------------------------------------------------------------------------------------------|
|                                                                                 | People with diabetes (N = 16) who taught the step to caregiver (%) | Caregivers (N = 16) who completed the step successfully (%) | Noninstructed acquaintances (N = 15) who completed the step successfully (%) |  |                                                                                                                                                                                                                                                                                             |
| Using the same syringe, hold bottle upside down                                 | 75                                                                 | 56                                                          | 13                                                                           |  | <ul style="list-style-type: none"> <li>• Did not reconstitute or use vial</li> <li>• Did not know how to withdraw solution from vial</li> </ul>                                                                                                                                             |
| With needle tip remaining in solution, gently withdraw all solution from bottle | 88                                                                 | 38                                                          | 7                                                                            |  | <ul style="list-style-type: none"> <li>• Did not reconstitute or use vial</li> <li>• Did not know how to withdraw solution from vial</li> </ul>                                                                                                                                             |
| Cleanse injection site                                                          | 88                                                                 | 13                                                          | 7                                                                            |  | <ul style="list-style-type: none"> <li>• Did not completely withdraw contents</li> <li>• Did not think to clean because in a hurry</li> <li>• Did not see instructions to clean</li> <li>• Unable to locate alcohol swab</li> </ul>                                                         |
| On buttock, arm, or thigh                                                       | 75                                                                 | 13                                                          | 7                                                                            |  | <ul style="list-style-type: none"> <li>• Injected through clothing like an EpiPen</li> <li>• Injected into stomach, that is, what was familiar from prior experience</li> <li>• Injected wrist because of high concentration of blood vessels in wrist</li> </ul>                           |
| Insert needle into loose tissue and inject all of the solution                  | 75                                                                 | 81                                                          | 67                                                                           |  | <ul style="list-style-type: none"> <li>• Injected only a partial dose</li> <li>• Did not inject any glucagon</li> <li>• Inject insulin instead of glucagon</li> </ul>                                                                                                                       |
| Apply light pressure at the injection site and withdraw the needle              | 38                                                                 | 38                                                          | 13                                                                           |  | <ul style="list-style-type: none"> <li>• Did not apply pressure to injection site, root cause not ascertained due to lack of time</li> </ul>                                                                                                                                                |
| Press an alcohol swab against the injection site                                | 19                                                                 | 0                                                           | 13                                                                           |  | <ul style="list-style-type: none"> <li>• Did not think to clean because in a hurry</li> <li>• Did not see instructions to clean</li> <li>• Unable to locate alcohol swab</li> <li>• Did not recall to use an alcohol swab</li> <li>• Did not think an alcohol swab was necessary</li> </ul> |

IG, Injectable Glucagon; NG, Nasal Glucagon.
